# Supplementary material for: Conserved miR-370-3p/BMP-7 axis regulates the phenotypic change of human vascular smooth muscle cells
Source: Springer Nature journal article supplement (doi:10.1038/s41598-022-26711-z), 2023-02-10
Supplement: MOESM1 [file 41598_2022_26711_MOESM1_ESM.pdf]

**Supplementary Table S1. Information of the qPCR primers****A. Primers for miRNAs**

| <b>miRNA</b> | <b>Cat. No.<br/>(Applied Biosystems)</b> | <b>Assay ID</b> |
|--------------|------------------------------------------|-----------------|
| miR-375-3p   | 4427975                                  | 000564          |
| miR-9a-5p    | 4427975                                  | 000583          |
| miR-370-3p   | 4427975                                  | 002275          |
| miR-206      | 4427975                                  | 000510          |
| miR-134-5p   | 4427975                                  | 001186          |
| miR-34c-5p   | 4427975                                  | 000428          |
| miR-130b-5p  | 4427975                                  | 002114          |
| miR-132-3p   | 4427975                                  | 000457          |
| miR-410-3p   | 4427975                                  | 001274          |
| U87          | 4427975                                  | 001712          |
| snoRNA       | 4427975                                  | 001718          |
| U6           | 4427975                                  | 001973          |

**B. Primers for mRNAs**

| <b>mRNA (Rat)</b> | <b>Cat. No. (Qiagen)</b> | <b>GeneGlobe ID</b> |
|-------------------|--------------------------|---------------------|
| BMP7              | 249900                   | QT01620885          |
| TWSG1             | 249900                   | QT01616825          |
| AR                | 249900                   | QT00184394          |
| WNT2B             | 249900                   | QT00396144          |
| TPD52L1           | 249900                   | QT01317603          |
| MYLK3             | 249900                   | QT01566656          |
| TSPAN2            | 249900                   | QT00182182          |
| CADM1             | 249900                   | QT01619429          |
| ISL1              | 249900                   | QT00188776          |
| SOCS2             | 249900                   | QT00384629          |
| BMPRI1A           | 249900                   | QT00193165          |
| SMAD6             | 249900                   | QT01582175          |

| <b>mRNA (Human)</b> | <b>Cat. No. (Qiagen)</b> | <b>GeneGlobe ID</b> |
|---------------------|--------------------------|---------------------|
| BMP7                | 330001                   | PPH00527A-200       |
| TPD52L1             | 330001                   | PPH08107A-200       |
| TSPAN2              | 330001                   | PPH14756A-200       |
| SOCS2               | 330001                   | PPH00756B-200       |
| SMAD6               | 330001                   | PPH01910F-200       |

| <b>mRNA</b> | <b>Sequence (Sense)</b> | <b>Sequence (Antisense)</b> |
|-------------|-------------------------|-----------------------------|
| KLF4        | TCAGTGGCCGCCACCGTGTC    | GTGAAGCTGCAGGTGGAGGGC       |
| Vimentin    | GCGAGGAGAGCAGGATTCTC    | ACCAGAGGGAGTGAATCCAGA       |
| 18S         | GGCCGTTCTTAGTTGGTGGAGCG | CTGAACGCCACTTGTCCCTC        |
| β-Actin     | TGGATCAGCAAGCAGGAGTATG  | GCATTTGCGGTGGCAGAT          |

## Conserved miR-370-3p/BMP-7 axis regulates the phenotypic change of human vascular smooth muscle cells.

Yerin Kim, Namhee Yu, Ye Eun Jang, Eunkyung Lee, Yeunjoo Jung, Doo Jae Lee, W. Robert Taylor, Hanjoong Jo, Jaesang Kim, Sanghyuk Lee\*, Sang Won Kang\*

## Supplementary Figures

**a**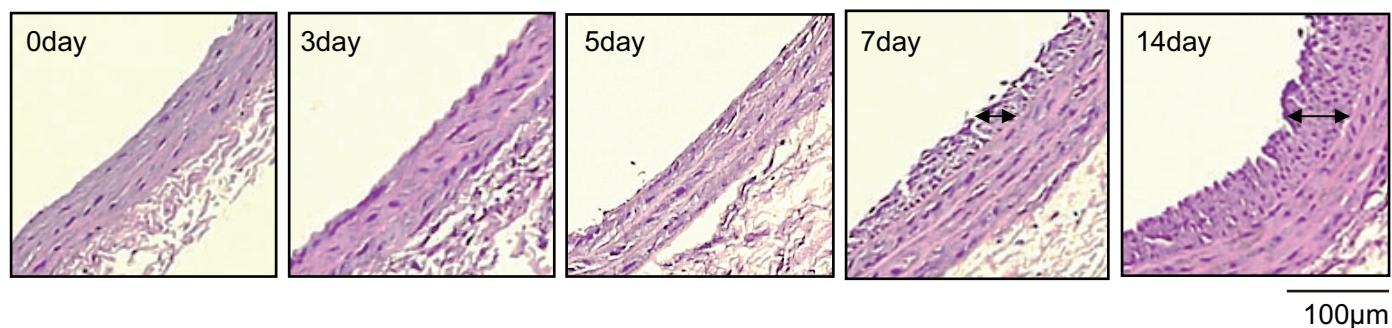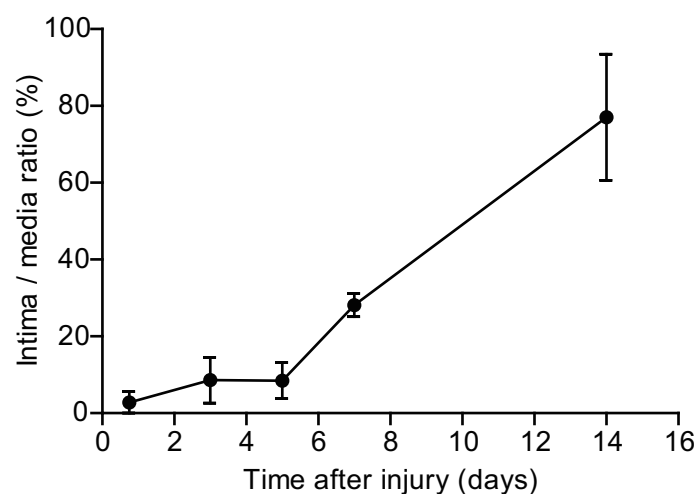**b**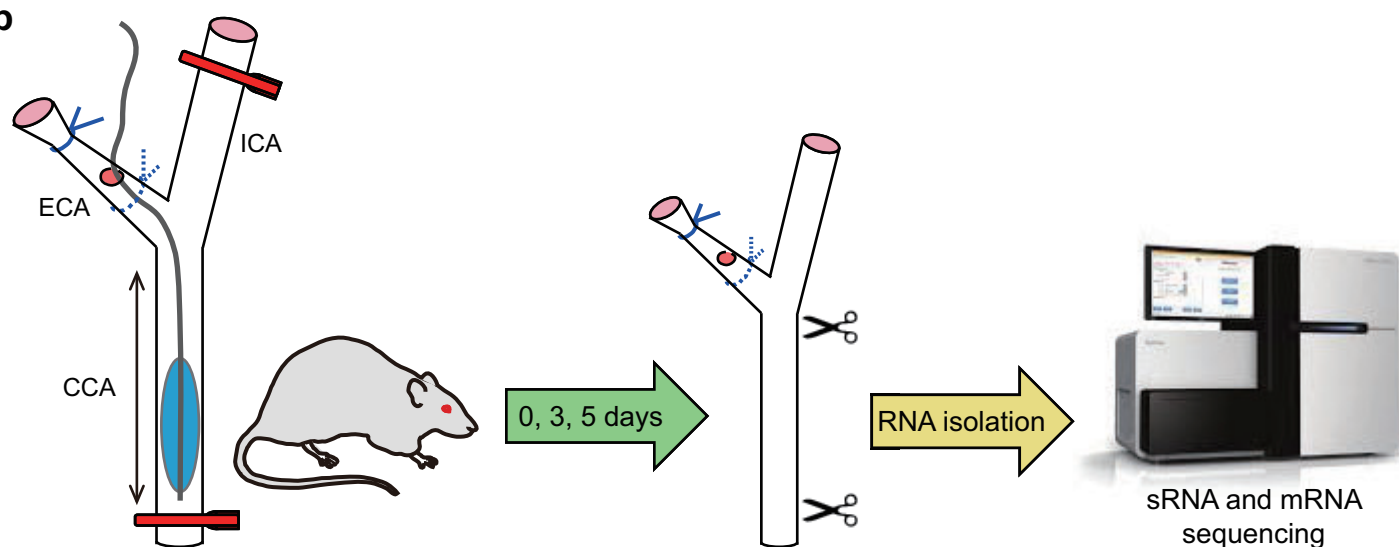

**Fig. S1** RNA sequencing procedure in the balloon-injured rat carotid model.

**a.** Neointimal thickening in the balloon-injured rat carotid arteries. Data in the graph are means  $\pm$  SEM of the intima-to-media ratio ( $n = 3$ ). Representative images are shown. Scale bar: 500  $\mu$ m.

**b.** Schematic drawing for the RNA sample preparation and sequencing procedure. The blue solid and dotted lines indicate permanent ligation before and after the injury, respectively. The red lines indicate temporal clamping.

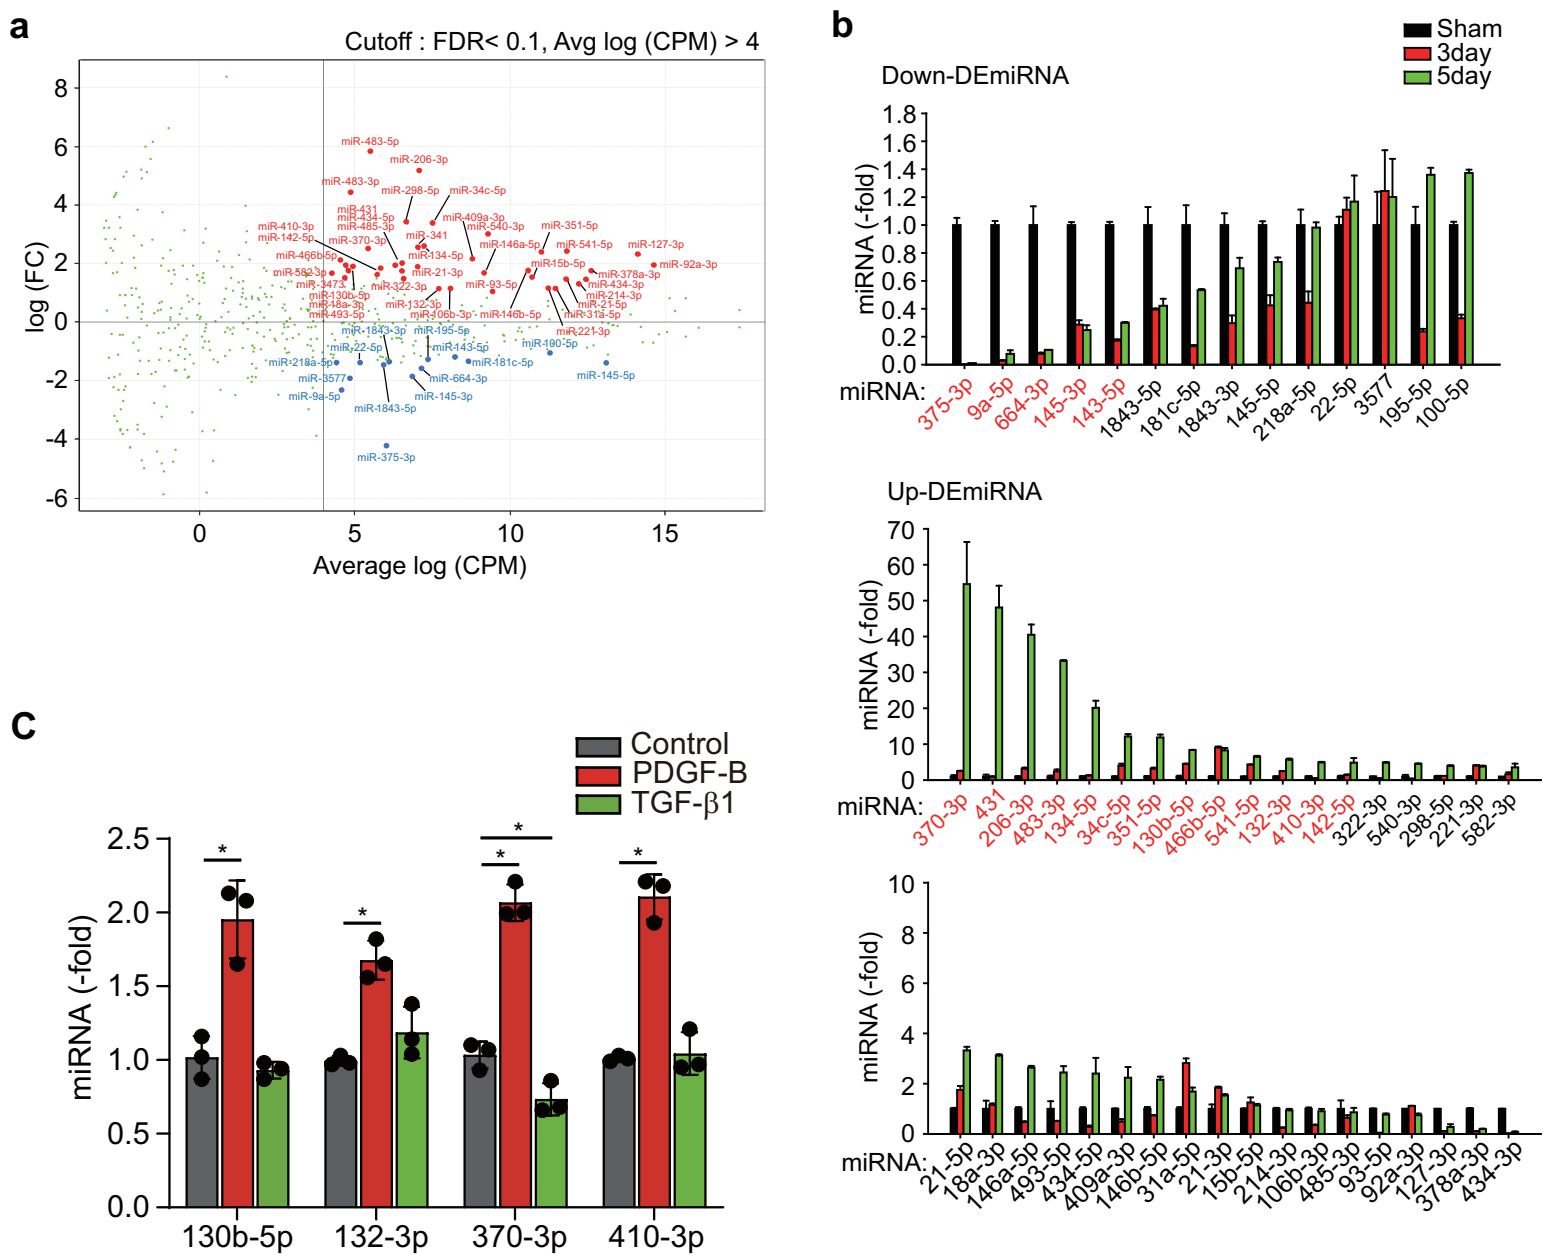

**Fig. S2** Profiling of differentially-expressed miRNAs in the rat carotid arteries subjected to the balloon injury.

**a.** The MA plot of the log2 fold changes (log FC) versus the log2 average expression (Average log CPM) of the differentially-expressed miRNAs. The up-regulated and down-regulated miRNAs with significant changes (FDR < 0.1 for log(FC); Average log(CPM)>4) are indicated by red and blue colors, respectively.

**b.** Real time qPCR data showing the relative expression levels of the DE-miRNAs. Data in graphs are means  $\pm$  SD of fold changes relative to sham control. The selected miRNAs are indicated by red color.

**c.** Expression levels of miRNAs in the HASMCs treated with growth factors. HASMCs were serum-starved for 24 h and stimulated with PDGF-BB (50 ng/ml) or TGF-β1 (2.5 ng/ml) for 24 h. Data in graphs are means  $\pm$  SD of fold changes relative to untreated control ( $n = 3$ , \*P < 0.01, \*\*P < 0.001).

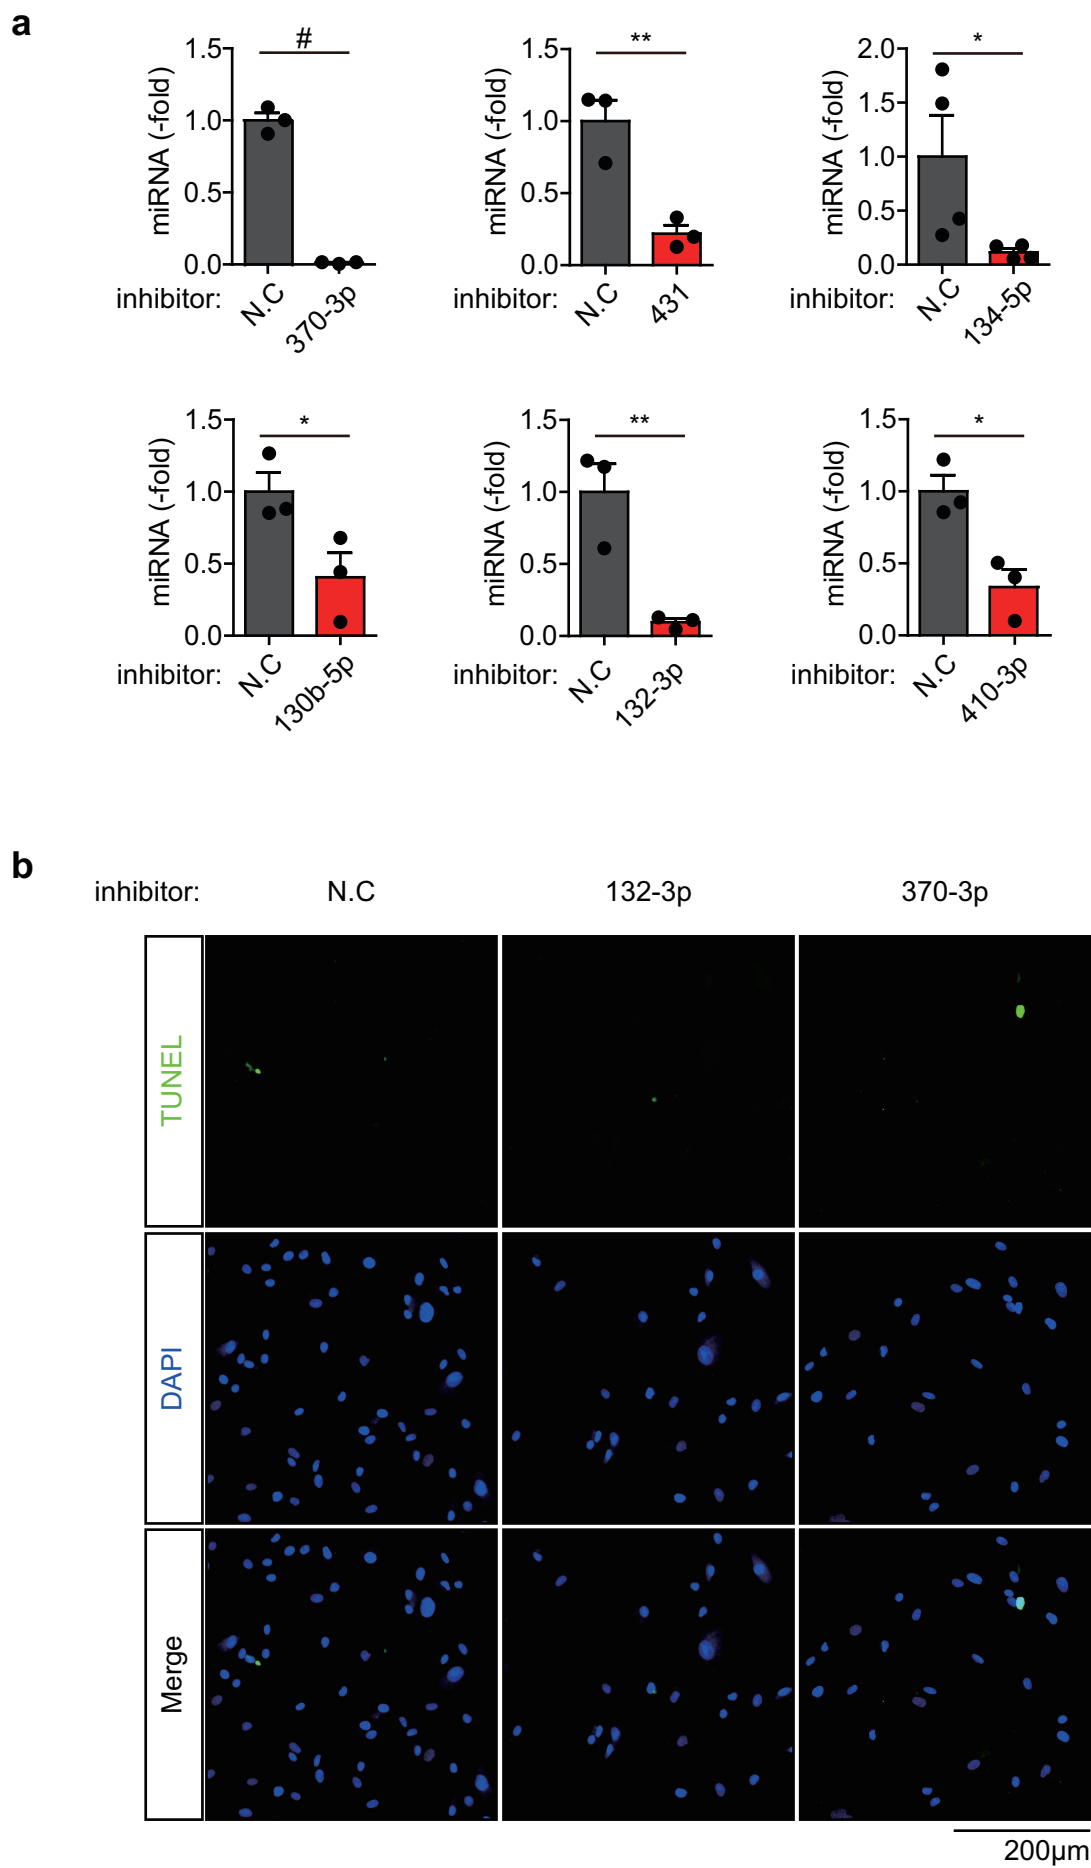

**Fig. S3** Effect of miRNA inhibitors on SMC apoptosis.

**a.** Knockdown of miRNA expressions by specific miRNA inhibitors in the HASMCs. HASMCs were transfected with each miRNA inhibitor for 48 h. Data in graphs are means  $\pm$  SEM of fold changes compared to non-specific control (N.C) (n = 3 or 4 , \*P < 0.05, \*\*P < 0.01, #P < 0.005).

**b.** Effects of miR-132-3p and miR-370-3p on the SMC apoptosis. Apoptotic cells were identified by TUNEL staining (green). DAPI labels nuclei (blue). No apoptotic cell were detected at 72 h after transfecting with miRNA inhibitors. Scale bar: 200  $\mu$ m.

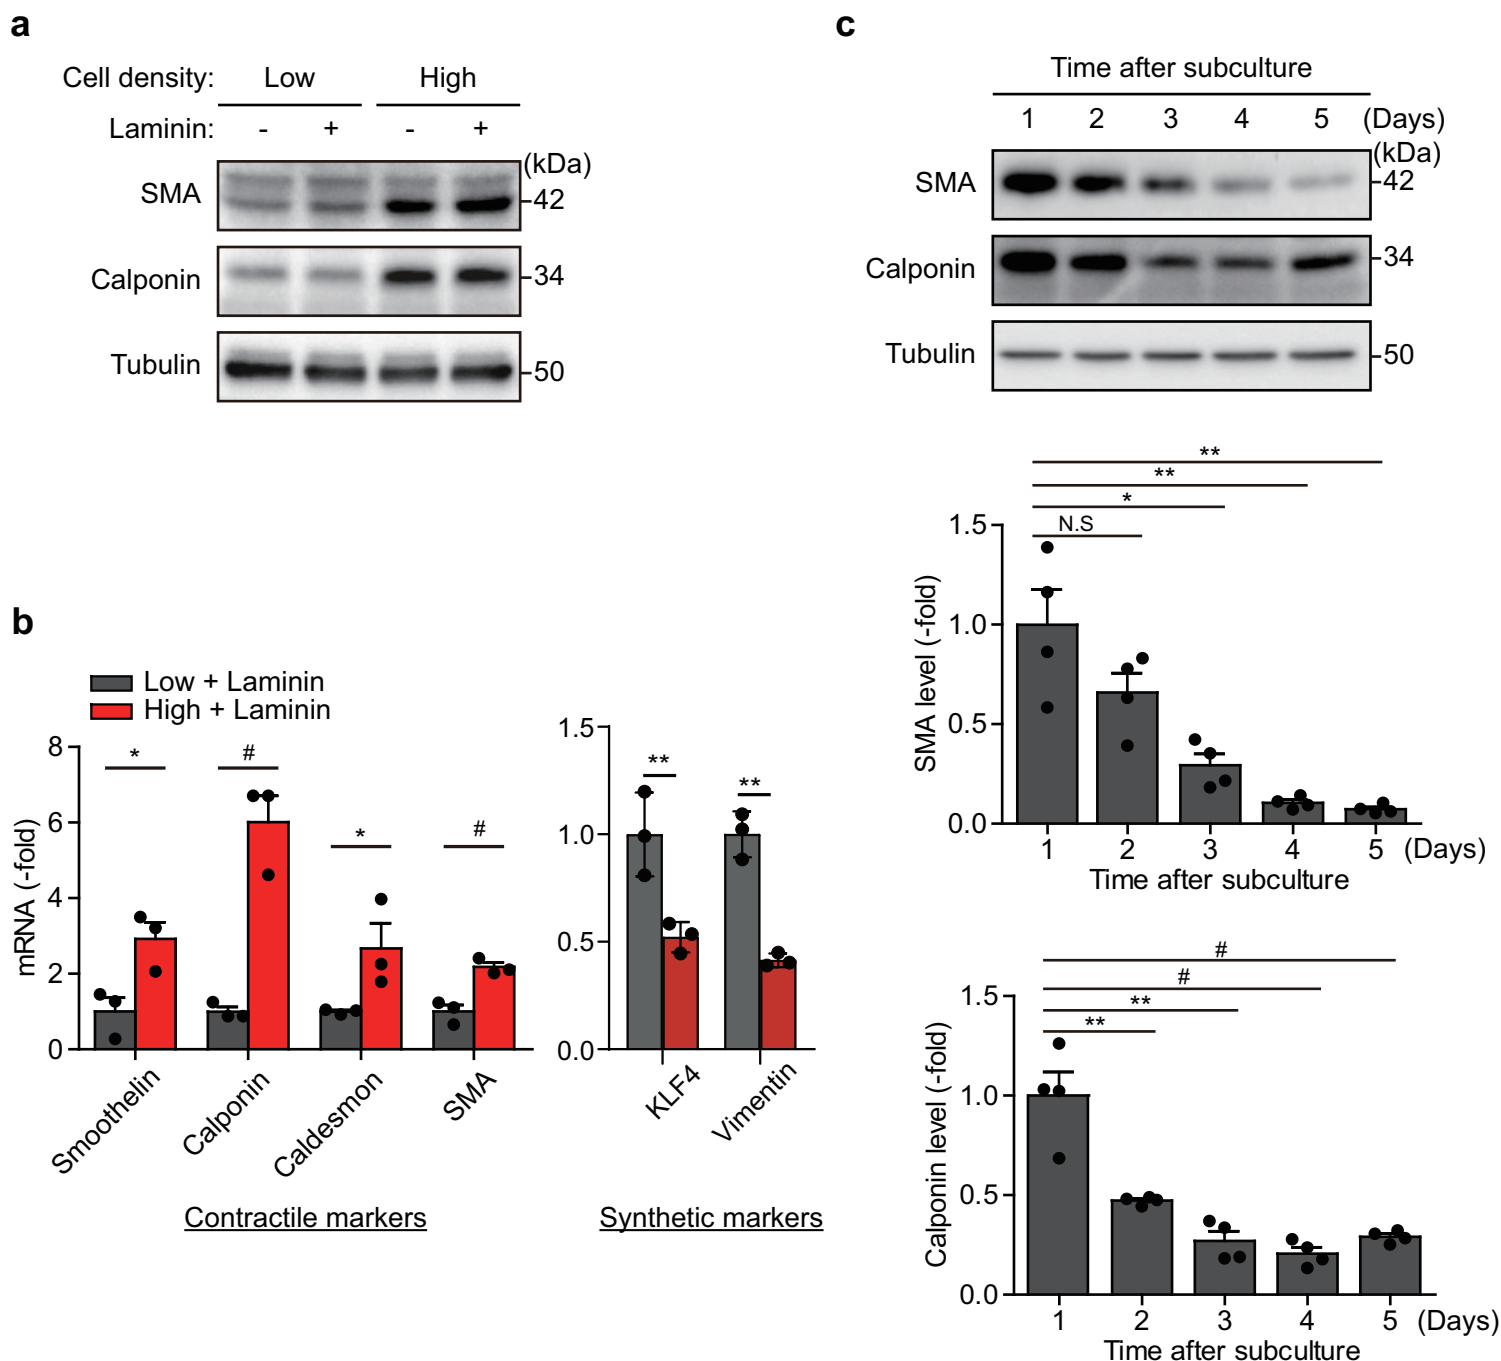

**Fig. S4** Cell density-dependent phenotypic switch in HASMCs.

**a** and **b**. Cell density-dependent SMC phenotypes. HASMCs were seeded at either low density ( $8 \times 10^3$  cells/cm<sup>2</sup>) or high density ( $1 \times 10^6$  cells/cm<sup>2</sup>). The culture plates were remained uncoated or coated with an extracellular matrix laminin (10  $\mu$ g/ml). Levels of contractile and synthetic phenotype markers were measured by immunoblotting (**a**) and real-time qPCR (**b**). Data in graphs (**b**) are means  $\pm$  SEM of fold changes relative to low-density cells ( $n = 3$ , \* $P < 0.05$ , \*\* $P < 0.01$ , # $P < 0.005$ ).

**c**. Induction of SMC transition from contractile to synthetic phenotypes by cell density. The high-confluent HASMCs were re-plated at low density and analyzed by immunoblotting the contractile markers at the indicated times. Data in graphs are means  $\pm$  SEM of fold changes relative to the band intensity in the first lane ( $n = 4$ , \* $P < 0.01$ , \*\* $P < 0.005$ , # $P < 0.001$ ). N.S., not significant.





[Uncropped immunoblot images]

Fig. 3c

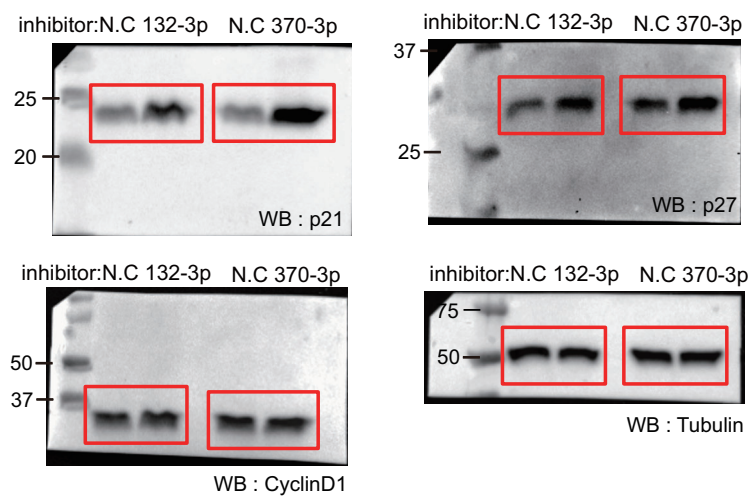

Fig. 3d

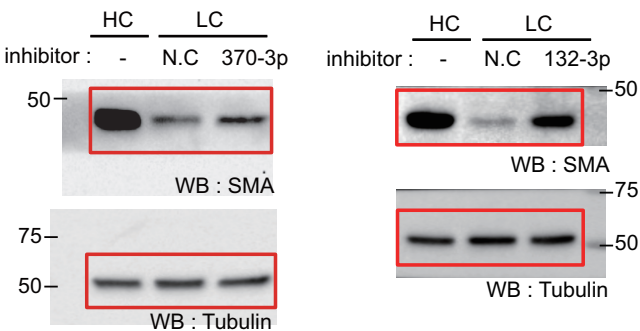

Fig. S4a

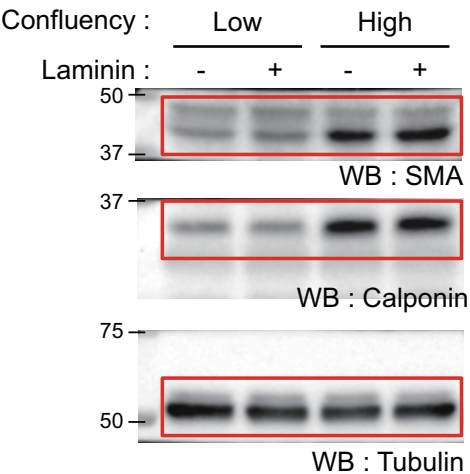

Fig. S4c

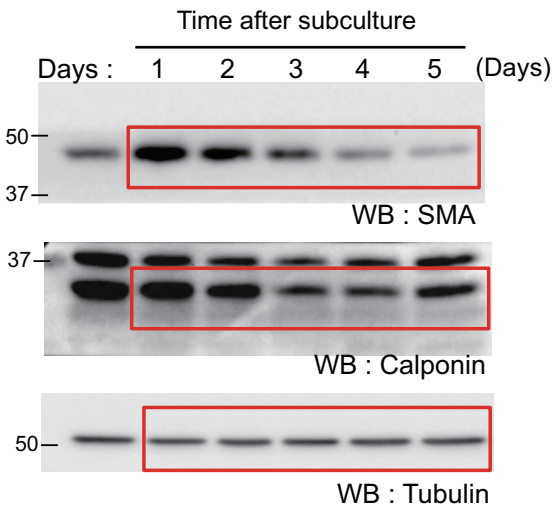

Fig. S5a

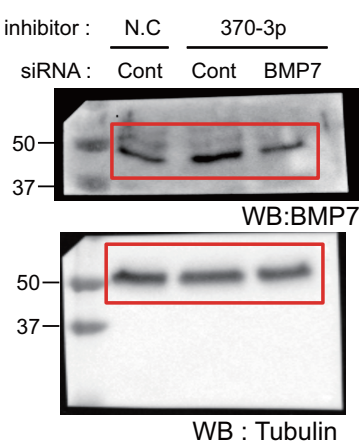

Fig. 5b

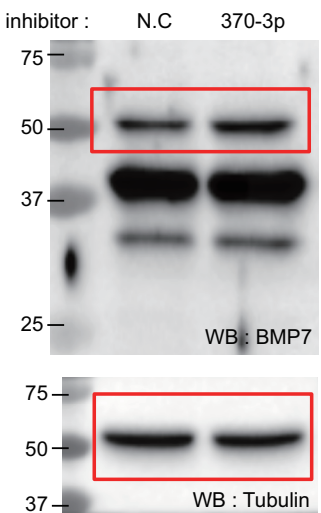

Fig. 5d

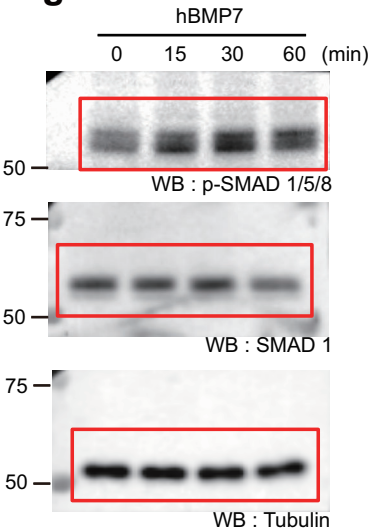

This images were taken using a ChemiDoc station and show the full-length membranes. Some membranes were cut for hybridization with different antibodies. Red boxes indicate the cropped region on the membrane and used in the figures.
